# Supplementary material for: Mast cell-derived TSLP triggers an allergic response, thereby suppressing the early stage of melanoma development
Source: Research Square preprint supplement (doi:10.21203/rs.3.rs-3613559/v1), 2023-11-16
Supplement: Supplementary file 1 [file 57bc132f81ee4b01b704e443.docx]

**Supplementary information for**

**Mast cell-derived TSLP triggers an allergic response, thereby suppressing the early stage of melanoma development**

Hee-Yun Kim1, So-Young Rah2, Ho-Geun Kang3,Hyung-Min Kim4,*, and Hyun-Ja Jeong1,3,5*

1 BioChip Research Center, Hoseo University, Asan 31499, Republic of Korea

2 Department of Biochemistry and Molecular Biology, Jeonbuk National University Medical School, Jeonju, 54907, Republic of Korea

3 Department of Bio-Convergence System, Graduate School, Hoseo University, Asan 31499, Republic of Korea

4 Department of Korean Medicine, Kyung Hee University, Seoul 02447, Republic of Korea. 5Department of Food Science & Technology, Hoseo University, Asan 31499, Republic of Korea

*Correspondence:

Hyun-Ja Jeong

hjjeong@hoseo.edu

Hyung-Min Kim

hmkim@khu.ac.kr

**Supplementary Materials and Methods**

**Tumor models**

Tumor growth was measured every 2 days after tumor inoculation using digital calipers. Tumor volume (V) was calculated by the formula; V = (length × width2)/2. There was no significant change in body weight between groups. For protein extraction, tumor samples were cut into pieces and immediately frozen in liquid nitrogen. For histological analysis, the remaining tumor tissues were fixed in 10% formalin.

To investigate the role of allergic reaction on melanoma development, C57BL/6N mice (n = 10 per group) were intraperitoneally (i.p.) or orally administrated with phosphate-buffered saline (PBS, control), compound 48/80 (5 mg/kg, mast cell degranulator, Sigma, St. Louis, MO, USA), IgE (1 mg/kg, Sigma), or cisplatin (1 mg/kg, anti-cancer drug, Sigma) every two days for 22 days. Melanoma growth was monitored over time. Through preliminary research, the concentration of compound 48/80 that was chosen was 5 mg/kg, which had no effect on the mortality brought on by anaphylactic shock in animal model.

To down-regulate TSLP levels, C57BL/6N mice (n = 10 per group) were subcutaneously injected with **scramble control siRNA or TSLP-specific siRNA (**TSLP SMARTpool, Dharmacon Inc., Chicago, IL, USA) **mixed with atelocollagen** (Atelogene *in vivo* siRNA transcription kit, Cosmo Bio Co., LTD, Japan) 48 h **before i.p.** injection with PBS or compound 48/80 (5 mg/kg) every two days for 22 days. Melanoma growth was monitored over time.

To investigate the role of TSLP on melanoma development, C57BL/6N mice (n = 10 per group) were given an i.p. injection ofPBS or recombinant (r) TSLP (2 μg, R & D Systems, Minneapolis, MN, USA) every two days for 22 days. Melanoma growth was monitored over time.

To investigate the role of TSLP on melanoma development of immunodeficient mice, BALB/c nude mice (immunodeficient mice, n = 10 per group) were given an i.p. injection ofPBS or rTSLP (2 μg, R & D Systems) every two days for 26 days. Melanoma growth was monitored over time. On day 26, the immobility time of the forced swimming test (FST) was assessed.

**Quantitative real-time-PCR (qRT-PCR)**

RNA of melanoma tissue or cell was extracted usingEasy-BLUETM RNA extraction kit (iNtRON Biotech Inc.). Reverse transcription and real-time PCR was conducted using cDNA synthesis kit (Bioneer Corporation, Daejeon, Republic of Korea) and Power SYBR Green PCR Master Mix using an ABI StepOne real-time PCR System (Applied Biosystems, Foster City, CA, USA) with the following primer pairs for the indicated genes: mouse TSLPR (5’GGGCCATGGTGTTTAAGGCTA3’ and 5’GAGCAGCGTCACATTCCAAG3’), mouse Dct2 (5’TCCTCCACTCTTTTACAGACG3’ and 5’ATTCGGTTGTGACCAATGGG3’), mouse gp100 (5’AGCACCTGGAACCACATCTA3’ and 5’CCAGAGGGCGTTTGTGTAGT3’), mouse LAMP1 (5′GCAAGGCGCTCGCCCTCAAT3′ and 5′GCCCGCGTGACTCCTCTTCC3′), mouse LAMP2 (5′AGCAGGTGGTTTCCGTGTCTCG3′ and 5′AGGGCTGCTCCCACCGCTAT3′), and mouse GAPDH (5’GGCAAATTCAACGGCACA3’ and 5’GTTAGTGGGGTCTCGCTCCTG3’). Gene expression was quantified relative to the expression of GAPDH. Fold change in gene expression was calculated using the ΔΔCT method. Reverse transcription PCR was performed with the following primers for mouse TSLPR (5’GGCAGGGGAATAACCGCGAGT3’ and 5’GAAGTGACACCAGCGCCGGAC3’), mouse IL-7Rα (5’TTAAAGCCGAGGCTCCCTCTGACC3’ and 5’TTGGACTCCACTCGCTCCAGAAGC3’), and GAPDH (5’TTCACCACCATGGAGAAGGC3’ and 5’GGCATGGACTGTGGTCATGA3’).The annealing temperature was 60°C for TSLPR, IL-7Rα, and GAPDH.

**Immunoblotting**

Western blot analysis was conducted as described previously using total protein lysates from either cell or melanoma tissue.17 Membranes with transferred proteins were incubated overnight with the following antibodies: The primary antibodies were used: anti-LC3 (Santa Cruz Biotechnology, CA, USA), anti-Beclin-1 (Santa Cruz Biotechnology), anti-JAK1 (Santa Cruz Biotechnology), anti-phosphorylated (p) JAK1 (Cell Signaling Technology, MA, USA), anti-JAK2 (Santa Cruz Biotechnology), anti-pJAK2 (Cell Signaling Technology, MA, USA), anti-STAT5 (Santa Cruz Biotechnology), anti-pSTAT5 (Santa Cruz Biotechnology), anti-class III PI3K (Cell Signaling Technology), anti-Atg5 (Santa Cruz Biotechnology), anti-p62 (Cell Signaling Technology), and anti-GAPDH (Santa Cruz Biotechnology). The next day, wash the membranes five times with PBS containing Tween 20 then incubated with horseradish peroxidase conjugated secondary antibodies (Santa Cruz Biotechnology). Proteins were detected using enhanced chemiluminescence solution (DoGenBio Co., Seoul, Korea).

**Competitive ELISA**

Competitive ELSIA was performed using a programmed cell death protein 1 (PD-1)/ programmed cell death ligand 1 (PD-L1). Inhibitor Screening Assay Kit, according to the supplier’s instructions. An aliquot of 1 μg/ml recombinant human PD-L1 (BPS Bioscience, #71104) were coated onto a 96-well plate overnight. Plates were washed with phosphate-buffered saline (PBS) containing 0.1% Tween (PBS-T), blocked for 1 h at room temperature with PBS-T containing 2% (w/v) bovine serum albumen, and washed again. After washing, vehicle or test samples were added, and the reaction continued for 1 h. As a positive control, PD-L1 inhibitor C1 was used. Biotinylated hPD–1 (BPS Bioscience, #71109) was added to each well, and plates were incubated for 2 h at room temperature. After three washes with PBS-T, diluted streptavidin-horseradish peroxidase (HRP) was added to each well, and plates were reacted for 1 h while shaking at low speed. After the reaction, plates were washed three times with PBS-T, and HRP substrates A and B were added. Relative chemiluminescence was measured on a SpectraMax L Luminometer (Molecular Devices, San Jose, California, USA) and expressed as the relative binding activity. The results were normalized to the relative percentage of the vehicle control group. All results are presented as the mean of three independent biological replicates.

**Single-cell RNA sequencing analysis**

Fresh specimens were immediately stored in the Tissue storage solution (miltenyi biotech, cat no. 130-100-008) at 4°C. Prior to dissociation, tissues were washed with Phosphate buffered saline (PBS) and minced into 1–2 mm pieces. The tissue pieces were then dissociated using the Tumor Dissociation Kit, mouse (miltenyi biotech, cat no. 130-096-730) and gentle MACS dissociator (miltenyi biotech), following the manufacturer’s instructions. Following dissociation, cell suspension was sequentially passed through 70 and 30 μm strainer to separate cells from cell debris and undigested tissue chunks. The cell suspensions were pelleted by centrifuging at 300 × *g*, 4°C, for 5 min and then erythrocytes were removed using red blood cell lysis solution (Miltenyi biotech, cat no. 130-094-183) on 25°C for 10 minutes. Cells washed 2 times with cold Ca2+ and Mg2+ free 0.04 % BSA/PBS at 300 × *g* for 5min at 4°C. Samples were gently resuspended in stain buffer (BD Biosciences, cat no. 554656), and then counted with a LUNA-FX7™ Automated Fluorescence Cell Counter (logos biosystems) using an acridine orange and propidium iodide staining (logos biosystems, cat no. F23001). The cell viability was further assessed using the Dead cells removal Kit (Miltenyi Biotech, Cat no 130-090-101) and MS columns (miltenyi biotech, cat no. 130-042-201) according to the manufacture’s instrument.

To multiplex samples, each sample was tagged with antibody-polyadenylated DNA barcode for mouse cells (BD Biosciences, cat no. 626545). Briefly, cells were stained with multiplexing antibody for 20 min at room temperature, and then washed 3 times by using stain buffer (BD Biosciences, cat no. 554656). After final washing, samples were gently resuspended in cold sample buffer (BD Biosciences, cat no. 633731), counted with a LUNA-FX7™ Automated Fluorescence Cell Counter (logos biosystems), and then pooled.

Single cell capture was performed using BD Rhapsody Express instrument according to the manufacturer’s instrument (BD Bioscience). Briefly, pooled cells from each sample in cold sample buffer were loaded into the BD Rhapsody cartridge (BD Biosciences, cat no. 633731). After cells separation, cell barcode-magnetic beads were loaded into the cartridge. Cells were lysed and the mRNA capture bead were retrieved. cDNA synthesis and Exonuclease I treatment were performed on the mRNA capture beads using BD Rhapsody cDNA kit (BD, cat no. 633773).

According to the ‘mRNA Whole Transcriptome Analysis and Sample Tag Library Preparation’ protocol (BD Bioscience), scRNA-seq libraries were constructed using BD Rhapsody Whole transcriptome analysis (WTA) amplification kit (BD, cat no. 633801). Briefly, for WTA library, cDNA was sequentially subjected to the random priming and extension (RPE), RPE amplification, and index PCR. And for sample tag library, cDNA was sequentially subjected to the nested PCR (PCR 1 and PCR 2), and index PCR.

The purified WTA and Sample tag libraries were quantified using qPCR according to the qPCR Quantification Protocol Guide (KAPA), and qualified using the Agilent Technologies 4200 TapeStation (Agilent technologies). And then libraries were pooled and sequenced using NovaSeq platform (Illumina), and 150 bp paired-end reads were generated. The sequencing depth of WTA library was about 17,000 reads/cell and sample tag library was about 400 reads/cell.

**
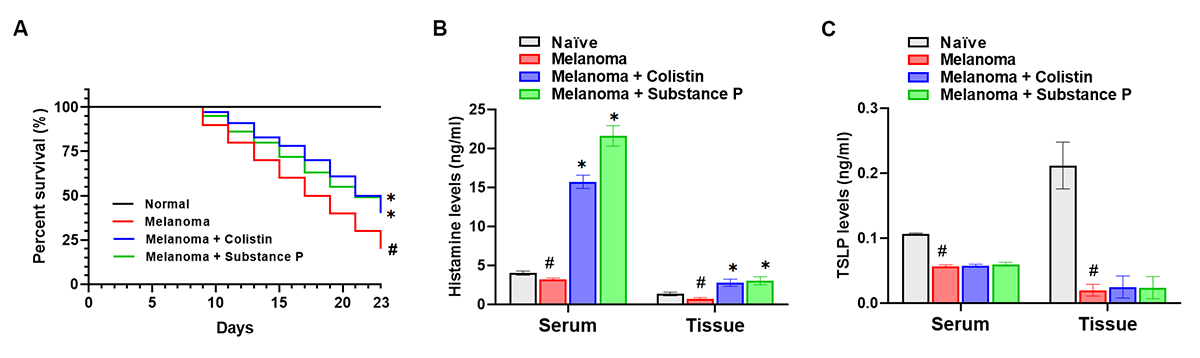
**

**Figure S1** Effect of colistin and substance P in melanoma growth of tumor control mice. C57BL/6 mice were inoculated with B16F10 cells by s.c injection of 3 × 105 cells to the right flank. The mice (n = 10 per group) were administrated with PBS, colistin (5 mg/kg), or substance P (1 mg/kg) every two days for 22 days. Survival rate. #p<0.05, significantly different from the normal mice. *p<0.05, significantly different from the B16F10-bearing mice.

**
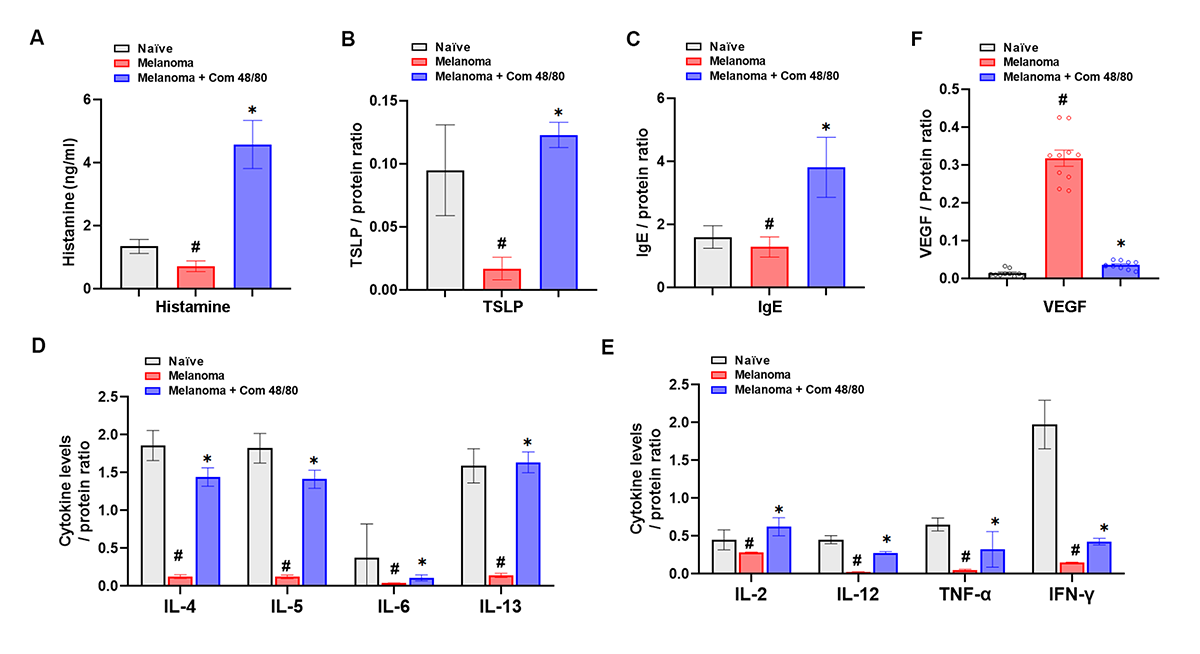
**

**Figure S2** Mast cell-mediated allergic reaction enhances levels of immunostimulatory factors in melanoma tissue of tumor control mice. The mice (n = 10 per group) were administrated with PBS or compound 48/80 (5 mg/kg) every two days for 22 days. (A) Histamine. ELISA analysis of (B) TSLP, (C) IgE, (D) IL-4, IL-5, IL-6, and IL-13, (E) IL-2, IL-12, TNF-α, and IFN-γ in tissue. (F) ELISA analysis of VEGF in tissue. Cytokine levels were normalized by total protein. #p<0.05, significantly different from the normal mice. *p<0.05, significantly different from the B16F10-bearing mice.


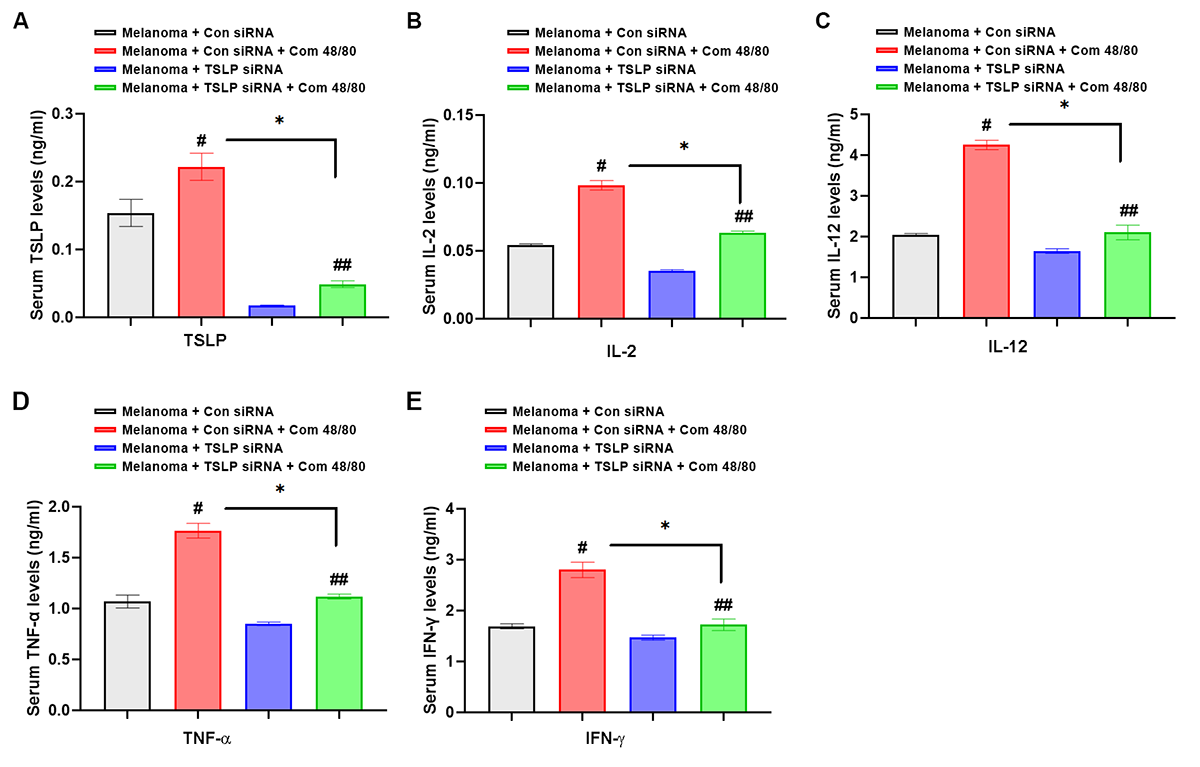


**Figure S3** TSLP deficiency attenuates levels of immunostimulatory factors. The mice (n = 10 per group) were given an i.v. injection of **scramble control siRNA or TSLP-specific siRNA before** administration with PBS or compound 48/80 (5 mg/kg) every two days for 22 days. ELISA analysis of (A) TSLP, (B) IL-2, (C) IL-12, (D) TNF-α, and (E) IFN-γ. #p<0.05; significantly different from the control siRNA tumor control mice. ##*P* < 0.05; significantly different from the TSLP siRNA tumor control mice. *p<0.05; significantly different from the control siRNA com 48/80-treated mice.


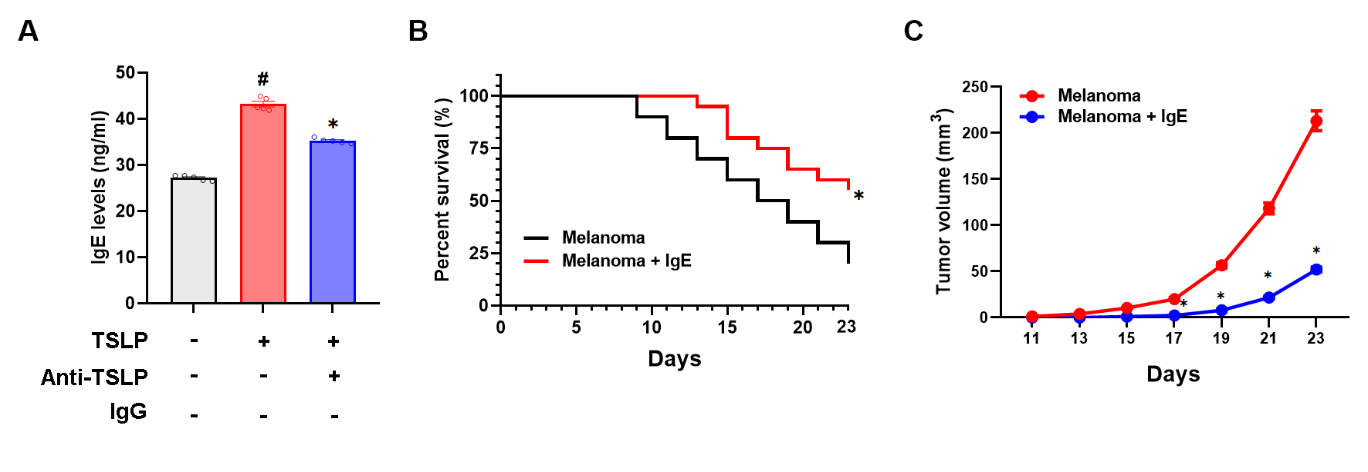


**Figure S4** TSLP increases production of IgE from U266 cells and IgE injection inhibits melanoma growth.(A) U266 **cells were stimulated with TSLP (20 ng/ml) and** Anti-TSLP (**20 ng/ml**) **for 24 h. ELISA analysis of IgE.** #p<0.05, significantly different from the unstimulated cells. *p<0.05, significantly different from the TSLP-treated cells. C57BL/6 mice were inoculated with B16F10 cells by s.c injection of 3 × 105 cells to the right flank. The mice (n = 5 per group) were administrated with PBS or IgE (1 mg/kg) every two days for 22 days. (B) Survival rate. (C) Tumor volume. *p<0.05, significantly different from the tumor control mice.


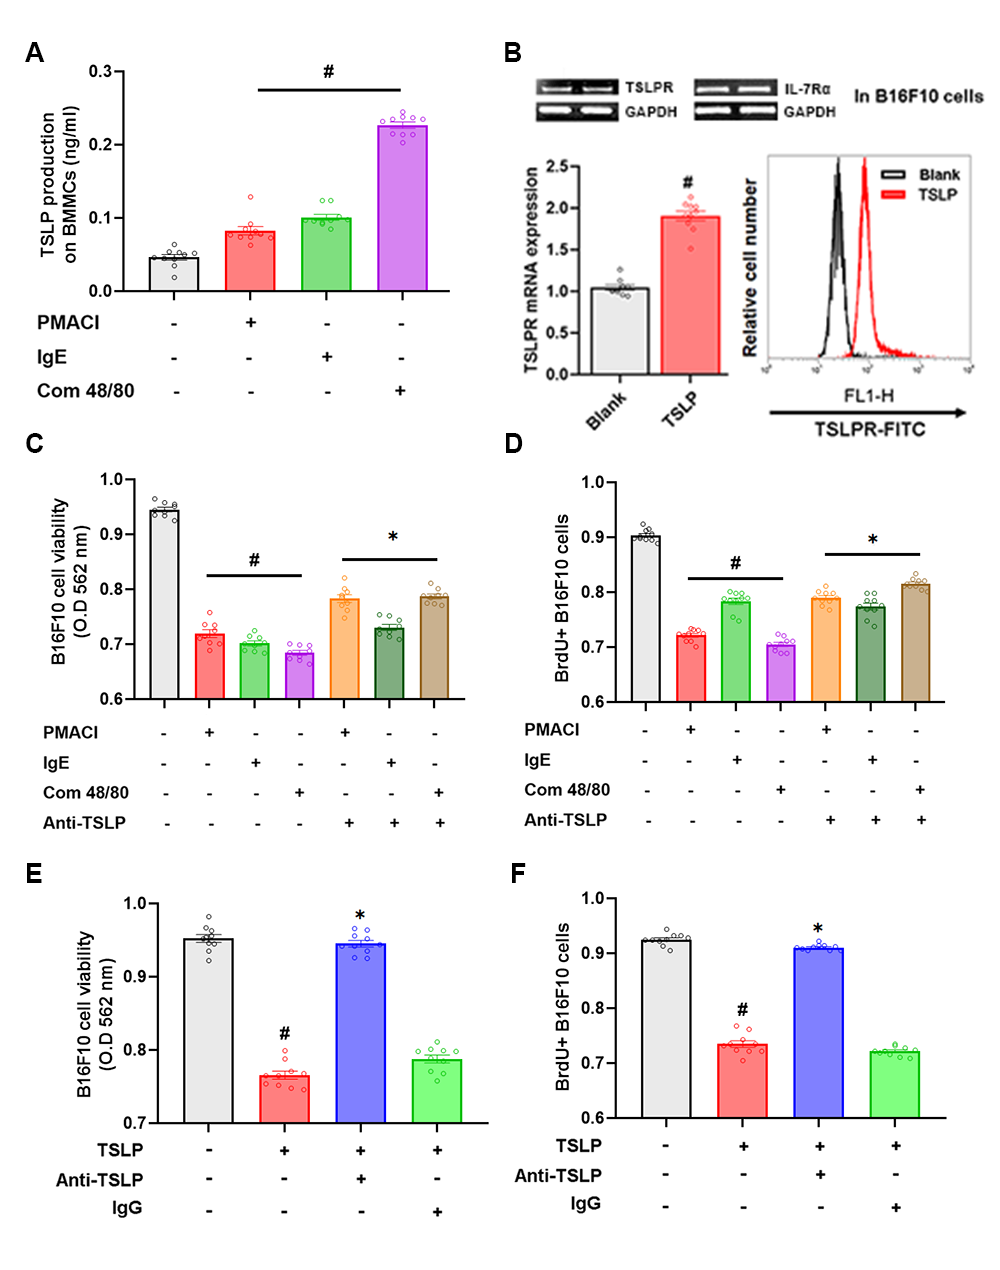


**Figure S5** Mast cell-derivedTSLP diminishes viability and growth of B16F10 cell. (A) BMMCs were stimulated with PMACI, IgE, or Com 48/80 for 24 h. ELISA analysis of TSLP. (B) B16F10cells were stimulated with TSLP (20 ng/ml) for 24 h or 48 h. Left, RT-PCR analysis of TSLPR and IL-7Rα mRNA expression and qRT-PCR analysis of TSLPR mRNA expression; right, FACS analysis of TSLPR. BMMCs were stimulated with PMACI, IgE, or Com 48/80 for 24 h. B16F10 cells were incubated with activated BMMCs culture supernatants and Anti-TSLP for 54 h. (C) Cell viability analysis of B16F10 cells using MTT assay. (D) Cell growth analysis of B16F10 cells using BrdU assay. B16F10cells were stimulated with TSLP (20 ng/ml), Anti-TSLP (20 ng/ml), or IgG for 48 h.(E) Cell viability analysis of B16F10 cells using MTT assay. (F) Cell growth analysis of B16F10 cells using BrdU assay. PMACI, PMA+A23187; IgE, IgE + antigen; Com 48/80, Compound 48/80. #p<0.05, significantly different from the unstimulated cells. *p<0.05, significantly different from the PMACI-, IgE-, Com 48/80-, or TSLP-treated cells.

**Table S1** Baseline characteristics for the normal and melanoma groups

| **Sample** | **Group** | **Sex profile** | **Age (y), Mean ± SD** |
| --- | --- | --- | --- |
| Serum  (n = 20) | Normal (n = 10) | 5M, 5F | 60.8 ± 3.89 |
| Melanoma (n = 10) | 6M, 4F | 53.4 ± 2.70 |

M, Male; F, Female

**Table S2** Effects of Com 48/80 on the blood biochemical parameters

|  | ALT  (U/L) | AST  (U/L) | LDH  (U/L) | BUN  (mg/dL) | CK  (mg/dL) | Glucose  (mg/dL) | CRP  (mg/dL) |
| --- | --- | --- | --- | --- | --- | --- | --- |
| Naïve | 35.07 ± 7.72 | 253.92 ± 12.09 | 915.15 ± 50.65 | 15.94 ± 0.85 | 0.19 ± 0.01 | 107.13 ± 16.86 | 0.17 ± 0.03 |
| Melanoma | 158.03 ± 8.29# | 714.29 ± 102.04# | 22245.88 ± 42.55# | 123.82 ± 3.40# | 2.95 ± 0.14# | 414.43 ± 44.40# | 0.87± 0.05# |
| Melanoma + Com 48/80 | 86.25 ± 8.75* | 425.00 ± 60.71* | 2878.79 ± 188.40* | 58.10 ± 1.16* | 0.3 ± 0.04* | 191.33 ± 12.23* | 0.4 ± 0.0.02* |

Values are means ± SEM.#p*<*0.05 *vs.* Naïve group. *p*<*0.05 *vs.* Melanoma group. **Com 48/80, compound 48/80** (5 mg/kg).

**Table S3** TSLP enhances levels of immunostimulatory cytokines in melanoma tissue of tumor control mice

| Cytokine/total protein rate | IL-4 | IL-5 | IL-13 | IL-2 | IL-12 | TNF-α | IFN-γ |
| --- | --- | --- | --- | --- | --- | --- | --- |
| Naïve | 0.65 ± 0.05 | 0.86 ± 0.06 | 0.96 ± 0.02 | 1.04 ± 0.06 | 0.36 ± 0.02 | 5.67 ± 0.3 | 4.17 ± 0.7 |
| Melanoma | 0.12 ± 0.05# | 0.22 ± 0.05# | 0.31 ± 0.01# | 0.29 ± 0.05# | 0.19 ± 0.04# | 1.52 ± 0.48# | 2.01 ± 0.4# |
| Melanoma + TSLP (2 μg) | 0.35 ± 0.06* | 0.54 ± 0.07* | 0.57 ± 0.03* | 0.63 ± 0.12* | 0.23 ± 0.06* | 2.7 ± 0.51* | 2.99 ± 0.38* |

Values are means ± SEM.#p*<*0.05 *vs.* Naïve group. *p*<*0.05 *vs.* Melanoma group.

**Table S4** Effects of TSLP on the blood biochemical parameters

|  | ALT  (U/L) | AST  (U/L) | LDH  (U/L) | BUN  (mg/dL) | CK  (mg/dL) | Glucose  (mg/dL) | CRP  (mg/dL) |
| --- | --- | --- | --- | --- | --- | --- | --- |
| Naïve | 37.54 ± 5.68 | 315.66 ± 10.20 | 1133 ± 52.00 | 15.25 ± 1.55 | 0.18 ± 0.01 | 109.58 ± 14.52 | 0.16 ± 0.02 |
| Melanoma | 135.68 ± 6.52# | 819.25 ± 100.55# | 22582 ± 70.50# | 152.30 ± 10.32# | 3.28 ± 0.21# | 395.15 ± 32.54# | 0.92 ± 0.03# |
| Melanoma + TSLP (2 μg) | 98.20 ± 10.89* | 498.60 ± 21.50* | 3528 ± 200.20* | 69.20 ± 01.52* | 0.35 ± 0.01* | 215.66 ± 12.51* | 0.43 ± 0.03* |

Values are means ± SEM.#p*<*0.05 *vs.* Naïve group. *p*<*0.05 *vs.* Melanoma group.
